# Supplementary material
Source: PubMed Central journal article supplement (PMC6939603)
Supplement: 10.1194_M092072_jlr.M092072-1.pdf [file 10.1194_M092072_jlr.M092072-1.pdf]

## Supplemental information

Surmiak et. Al. LTB4 and 5-oxo-ETE from extracellular vesicles stimulate neutrophils in granulomatosis with polyangiitis

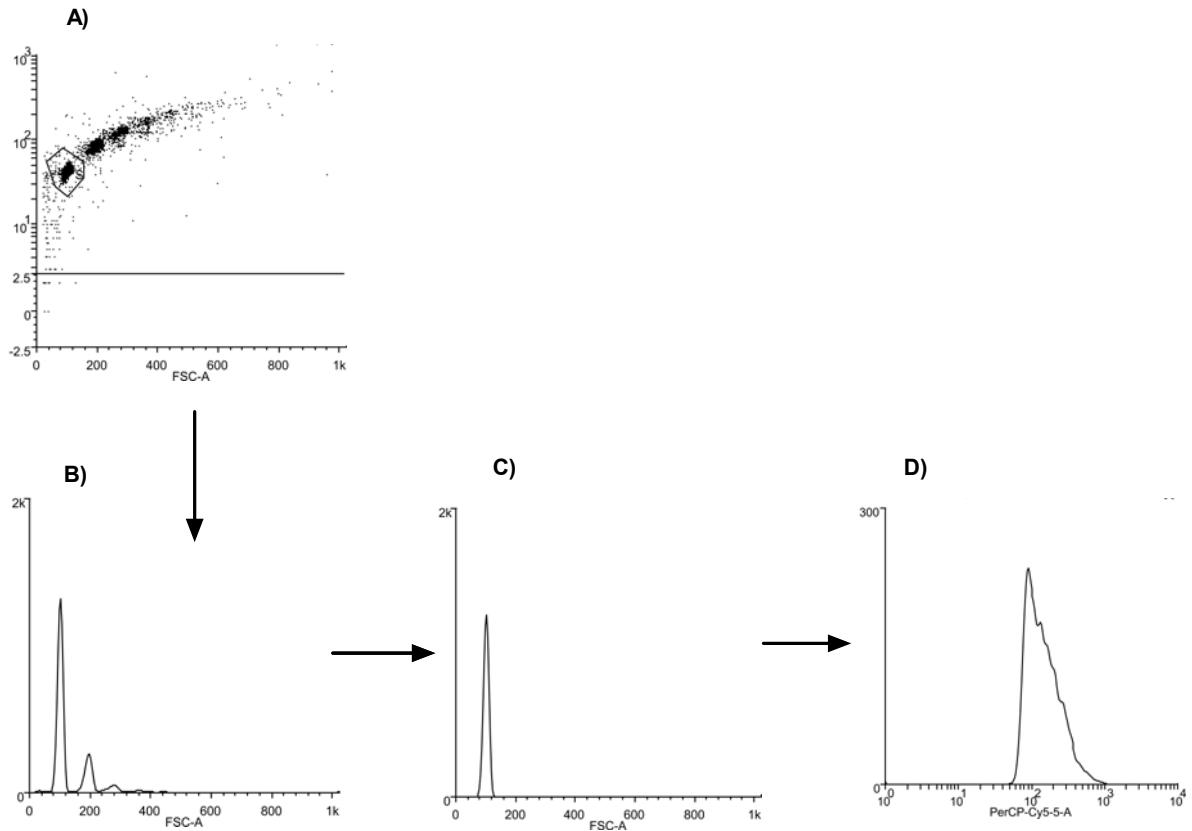

**Supplemental Figure S1.** Gating strategy for flow cytometry analysis of EV coated aldehyde beads. Based on forward and side scatter (FS/SS), beads were first gated for singlets (Panel A). Histograms (FS) of aldehyde -beads before gating (Panel B) and after gating (Panel C). Panel D – CD81 expression of EV coated aldehyde-beads.
