# Supplementary material
Source: PubMed Central journal article supplement (PMC6939603)
Supplement: 10.1194_M092072_jlr.M092072-4.pdf [file 10.1194_M092072_jlr.M092072-4.pdf]

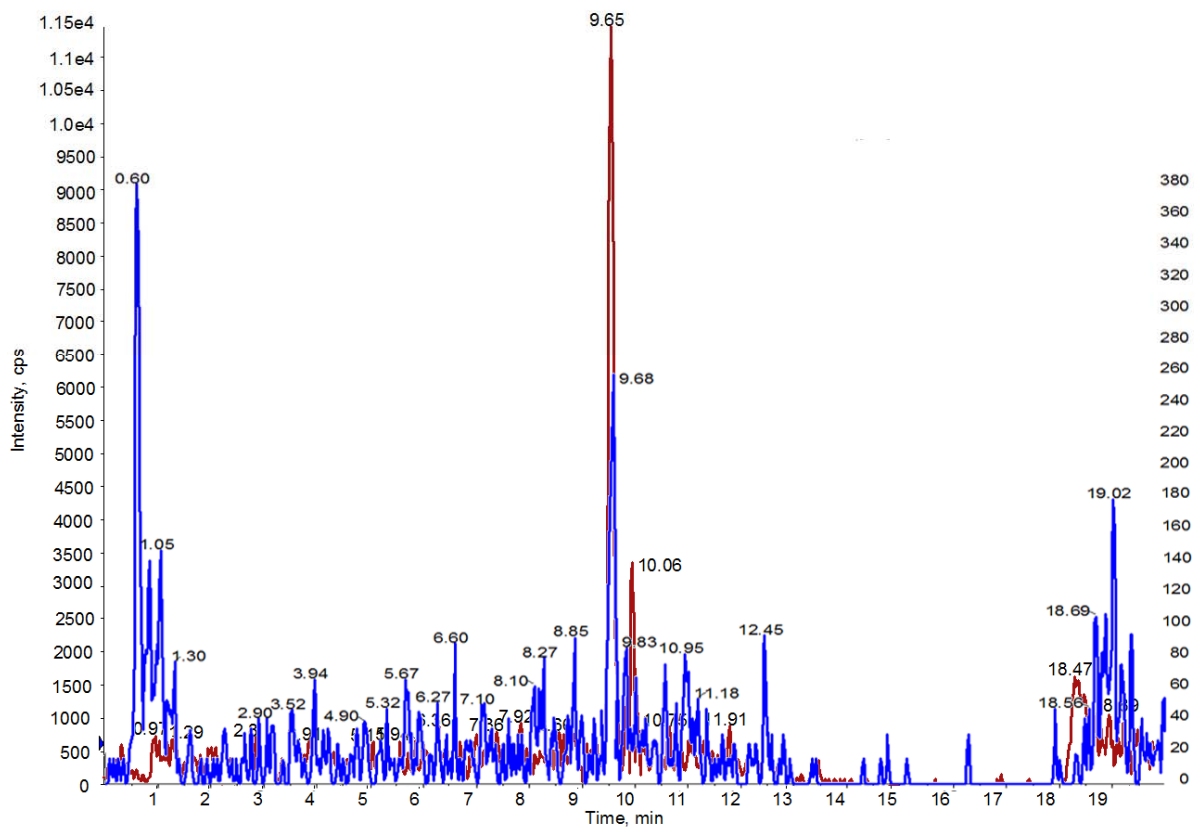

Supplemental Figure S2. of HPLC separated LTB<sub>4</sub>. Internal standard added to the sample prior extraction (red) and overlaid sample (blue). Left scale corresponds to the counts per second (cps) for internal standard and right for sample. Monitored ion pairs (MRM) were 339.1/130.1 amu for internal standard and 335.1/129.1 amu for EV sample.
