# Supplementary material
Source: PubMed Central journal article supplement (PMC6939603)
Supplement: 10.1194_M092072_jlr.M092072-5.pdf [file 10.1194_M092072_jlr.M092072-5.pdf]

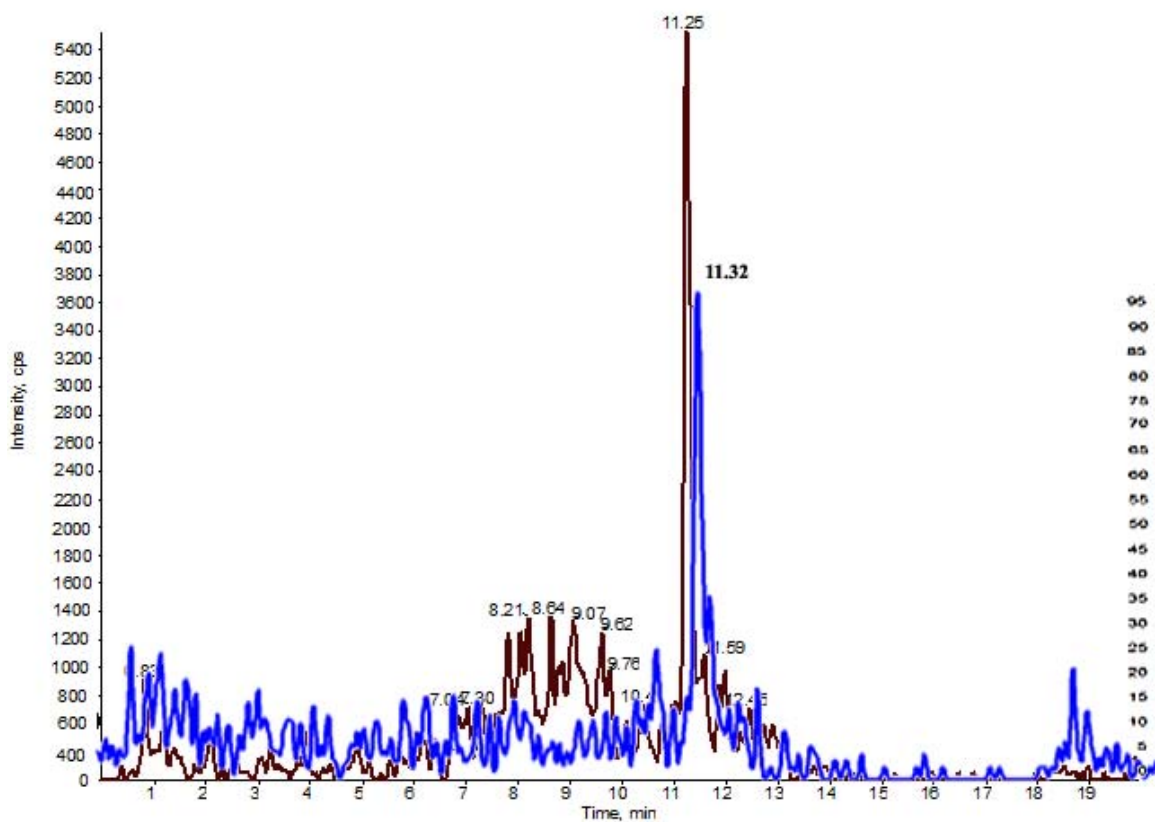

**Supplemental Figure S3.** of HPLC separated for 5-oxo-ETE. Internal standard added to the sample prior extraction (black) and overlaid sample (blue). Left scale bar corresponds to the counts per second (cps) for internal standard and right for sample. Monitored ion pairs (MRM) were 324.3/210.3 amu for the internal standard and 317.3/203.2 amu for EV sample.
