# Supplementary material
Source: PubMed Central journal article supplement (PMC6939603)
Supplement: 10.1194_M092072_jlr.M092072-6.pdf [file 10.1194_M092072_jlr.M092072-6.pdf]

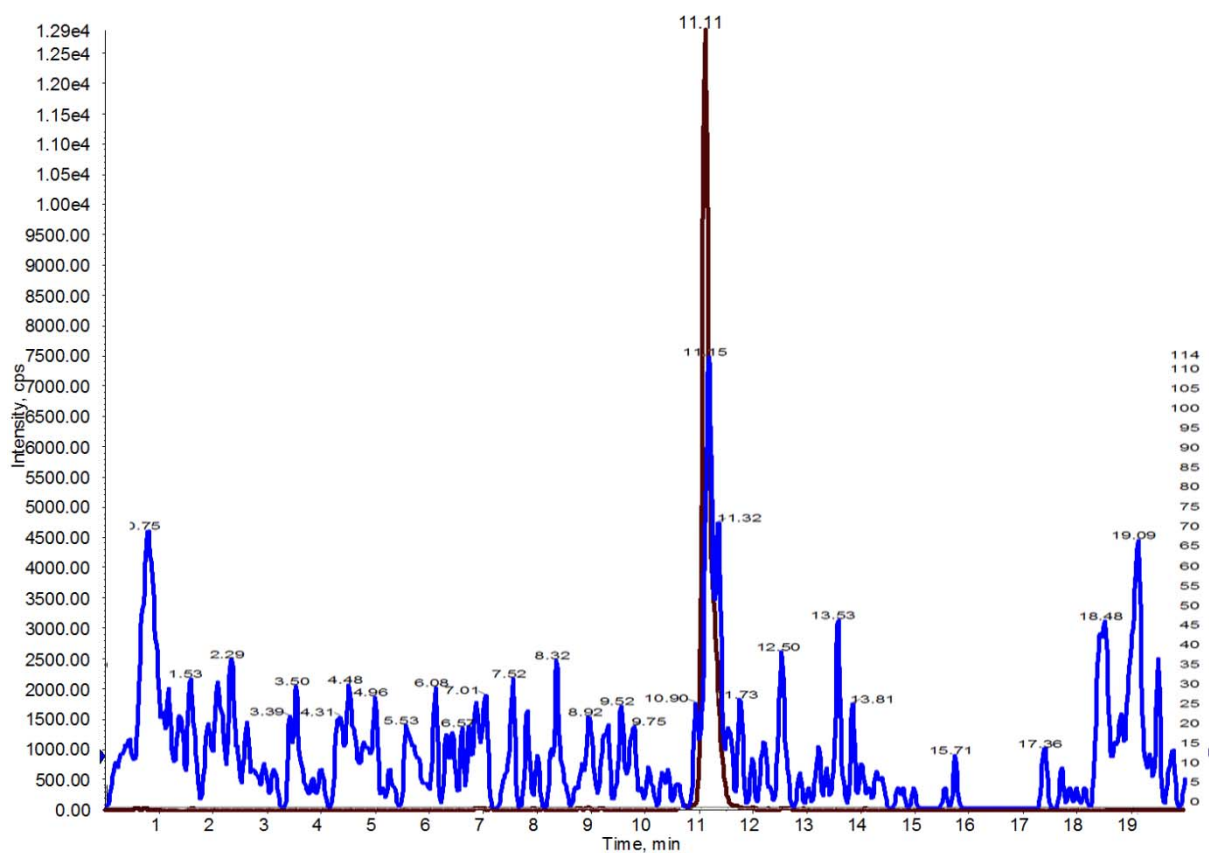

**Supplemental Figure S4.** Chromatogram of HPLC separated 5-HETE. Internal standard added to the sample prior extraction (black) and overlaid sample (blue). Left scale bar corresponds to the counts per second (cps) for internal standard and right for sample. Monitored ion pairs (MRM) were 327.1/116.1 amu for the internal standard and 319.1/115.1 amu for EV sample.
