# Supplementary material
Source: PubMed Central journal article supplement (PMC6939603)
Supplement: 10.1194_M092072_jlr.M092072-10.pdf [file 10.1194_M092072_jlr.M092072-10.pdf]

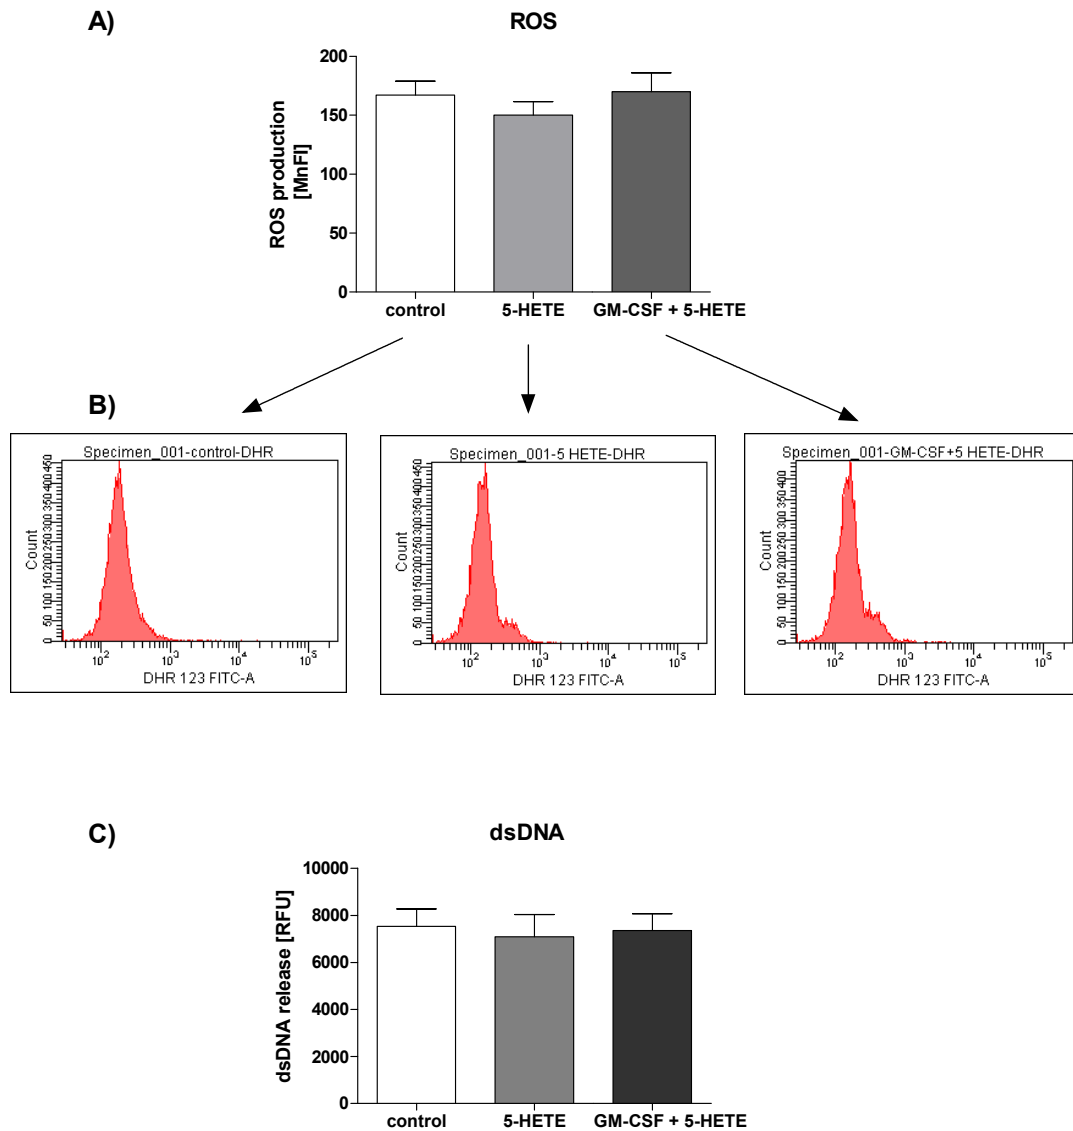

**Supplemental Figure S7.** ROS production (panel A and B) and dsDNA release (panel C) by human neutrophils primed with GM-CSF and stimulated with 5-HETE. Neutrophils isolated from the blood of healthy donors (n=6) were primed with GM-CSF (25 ng/ml) or left not primed for 15 minutes at 37°C, and stimulated with 5-HETE. Concentration of 5 pg/ml is representative for the mean concentration of 5-HETE in experiments in which cells were stimulated with plasma derived EV isolated from patients with GPA. Panel B – representative histograms of DHR 123 fluorescence in stimulated cells. Results are presented as mean±SD and analyzed with the use of ANOVA and Tukey *post-hoc* test.
